# Supplementary material for: Iron Status and Physical Performance in Athletes
Source: MDPI journal article supplement (doi:10.3390/life13102007), 2023-10-02
Supplement: s1 [file s1]

The search was performed in Pubmed.

Dato: 15.06.2023

#1

Search: "Hemoglobins"[Mesh:NoExp] OR "Iron"[Mesh:NoExp] OR "Iron Deficiencies"[Mesh] OR "Hepcidins"[Mesh] OR "Ferritins"[Mesh:NoExp]  
[190,894](#)

#2

Search: Iron[Title/Abstract] OR ferritin\*[Title/Abstract] OR transferrin\*[Title/Abstract] OR hepcidin\*[Title/Abstract] OR haemoglobin[Title/Abstract] OR hemoglobin[Title/Abstract]  
[447,408](#)

#3 (#1 OR #2)

Search: ("Hemoglobins"[Mesh:NoExp] OR "Iron"[Mesh:NoExp] OR "Iron Deficiencies"[Mesh] OR "Hepcidins"[Mesh] OR "Ferritins"[Mesh:NoExp]) OR (Iron[Title/Abstract] OR ferritin\*[Title/Abstract] OR transferrin\*[Title/Abstract] OR hepcidin\*[Title/Abstract] OR haemoglobin[Title/Abstract] OR hemoglobin[Title/Abstract])  
[494,760](#)

#4

Search: "Athletes"[Mesh:NoExp] OR "Athletic Performance"[Mesh]  
[77,747](#)

#5

Search: Athlete\*[Title/Abstract] OR athletic[Title/Abstract]  
[77,450](#)

#6 (#3 OR #4)

Search: ("Athletes"[Mesh:NoExp] OR "Athletic Performance"[Mesh]) OR (Athlete\*[Title/Abstract] OR athletic[Title/Abstract])  
[130,159](#)

#7 (#3 AND #6)

Search: (("Hemoglobins"[Mesh:NoExp] OR "Iron"[Mesh:NoExp] OR "Iron Deficiencies"[Mesh] OR "Hepcidins"[Mesh] OR "Ferritins"[Mesh:NoExp]) OR (Iron[Title/Abstract] OR ferritin\*[Title/Abstract] OR transferrin\*[Title/Abstract] OR hepcidin\*[Title/Abstract] OR haemoglobin[Title/Abstract] OR hemoglobin[Title/Abstract])

**hemoglobin[Title/Abstract])) AND (("Athletes"[Mesh:NoExp] OR "Athletic Performance"[Mesh]) OR (Athlete\*[Title/Abstract] OR athletic[Title/Abstract]))**  
[2,676](#)

#8 (#3 AND #6, Filters: in the last 10 years)

**Search: (("Hemoglobins"[Mesh:NoExp] OR "Iron"[Mesh:NoExp] OR "Iron Deficiencies"[Mesh] OR "Hepcidins"[Mesh] OR "Ferritins"[Mesh:NoExp]) OR (Iron[Title/Abstract] OR ferritin\*[Title/Abstract] OR transferrin\*[Title/Abstract] OR hepcidin\*[Title/Abstract] OR haemoglobin[Title/Abstract] OR hemoglobin[Title/Abstract])) AND (("Athletes"[Mesh:NoExp] OR "Athletic Performance"[Mesh]) OR (Athlete\*[Title/Abstract] OR athletic[Title/Abstract])) Filters: in the last 10 years**  
[1,150](#)

#9 (#3 AND #6, Filters: in the last 10 years, Adult: 19-44 years)

**Search: (("Hemoglobins"[Mesh:NoExp] OR "Iron"[Mesh:NoExp] OR "Iron Deficiencies"[Mesh] OR "Hepcidins"[Mesh] OR "Ferritins"[Mesh:NoExp]) OR (Iron[Title/Abstract] OR ferritin\*[Title/Abstract] OR transferrin\*[Title/Abstract] OR hepcidin\*[Title/Abstract] OR haemoglobin[Title/Abstract] OR hemoglobin[Title/Abstract])) AND (("Athletes"[Mesh:NoExp] OR "Athletic Performance"[Mesh]) OR (Athlete\*[Title/Abstract] OR athletic[Title/Abstract])) Filters: in the last 10 years, Adult: 19-44 years**
